# Supplementary material for: Machine Learning Prediction of Discharge Destination in Patients with Parkinson’s Disease; A Nationwide Cohort Study
Source: Research Square preprint supplement (doi:10.21203/rs.3.rs-8399223/v1), 2026-01-08
Supplement: Supplementary file 1 [file ca66bcab5b717bd68c88b5c7.docx]

**Supplementary Table S1. Variable importance for predicting discharge in the Random Forest model**

| **Variable** | **Variable Importance** | | |
| --- | --- | --- | --- |
| **Home** | **Facility** | **Death** |
| Age (years) | 22575.3 | 23904.1 | 27316.6 |
| Sex | 4082.1 | 4272.2 | 5192.5 |
| Race | 4041.0 | 4248.9 | 5736.7 |
| Marital status | 2697.4 | 2528.6 | 5398.1 |
| Residence type (home / transfer / other) | 2399.4 | 2424.2 | 3212.2 |
| Insurance type | 1761.6 | 1683.1 | 2380.9 |
| Geographic region | 7320.7 | 6901.0 | 11254.9 |
| Teaching hospital | 3761.4 | 3865.2 | 5225.9 |
| Bed capacity | 11103.0 | 11310.7 | 14651.5 |
| Charlson Comorbidity Index | 11624.5 | 11503.7 | 15623.5 |
| Dementia | 4314.9 | 2949.1 | 3408.0 |
| Dysphagia | 2347.8 | 2712.9 | 3179.0 |
| Aspiration pneumonia | 2114.9 | 1857.3 | 8300.7 |
| Fracture | 3789.9 | 3963.3 | 2371.2 |
| Fall history | 2575.6 | 2805.5 | 2811.0 |
| Polypharmacy | 764.9 | 818.5 | 783.7 |
| Urinary catheter | 1149.3 | 1242.4 | 1746.7 |
| PEG tube | 202.6 | 267.5 | 753.0 |
| Length of stay (days) | 22854.4 | 23056.4 | 23236.0 |
| Rehabilitation frequency | 18311.9 | 24691.3 | 21297.7 |
| Admission source | 5760.1 | 5110.4 | 5668.1 |

Variable importance derived from the tuned random forest model for predicting discharge destination. Variables are ranked by their overall importance scores.
